# Supplementary material
Source: PubMed Central journal article supplement (PMC6141177)

# **IL6 and CXCL8 mediate osteosarcoma-lung interactions critical to metastasis**

## **Supplemental Information – Xenograft Biology**

A detailed understanding of the interactions of human and murine cytokines/chemokines on the receptors of the other species is essential to the understanding and interpretation of results such as those presented here. In these studies, the biology of IL6 is particularly important to facilitating accurate interpretation. Human and murine IL6 cytokines are homologous, as are their receptors. However, it has been reported that, while human IL6 very effectively activates the murine receptor, the reverse is not true (1). Therefore, while human tumor cells in a xenograft model can activate murine “host” cells, IL6 produced by the murine host cells will not activate the IL6 receptor complex in the human tumor cells. Given the single previous publication demonstrating this concept, we sought to validate this concept before accepting it as true. Our results (**Supplemental Figure 7**) were consistent with those reported previously.

The study of CXCL8 biology using murine models is likewise not straightforward. Mice do not make CXCL8, and there is no obvious murine homolog for that cytokine. The biology of murine CXCL8 as it relates to analogous human chemokine biology has been studied extensively (reviewed in (2)). Most agree that related cytokines (most notably KC and MIP-2) serve as functional orthologs of human CXCL8 in mice. These chemokines also signal through murine CXCR1 and 2. Importantly, human CXCL8 activates murine CXCR1/2 and elicits biological responses similar to those seen in humans (2). Conversely, murine KC and MIP-2 can activate the human CXCR1 and 2 and elicit responses similar to activation with CXCL8. Importantly, we note that marked effects were seen when we knocked down IL-8 in the human tumors implanted

into mice (**Figure 5**). For these reasons, we feel that studies of IL-8 biology can be undertaken in mice, though results should be interpreted with caution.

1. van Dam M, Müllberg J, Schooltink H, Stoyan T, Brakenhoff JP, Graeve L, et al. Structure-function analysis of interleukin-6 utilizing human/murine chimeric molecules. Involvement of two separate domains in receptor binding. *J Biol Chem.* 1993;268:15285–90.
2. Singer M, Sansonetti PJ. IL-8 Is a Key Chemokine Regulating Neutrophil Recruitment in a New Mouse Model of Shigella-Induced Colitis. *J Immunol.* 2004;173:4197–206.
3. Singh S, Sadanandam A, Varney ML, Nannuru KC, Singh RK. Small Interfering RNA-mediated CXCR1 or CXCR2 Knock-Down Inhibits Melanoma Tumor Growth and Invasion. *Int J Cancer.* 2010;126:328–36.
4. Root DE, Hacohen N, Hahn WC, Lander ES, Sabatini DM. Genome-scale loss-of-function screening with a lentiviral RNAi library. *Nat Methods.* 2006;3:715–9.

**Supplemental Table 1. qRT-PCR Primer Sequences.**

| Target                 | Amplicon | Forward Sequence               | Reverse Sequence              |
|------------------------|----------|--------------------------------|-------------------------------|
| <b>Candidate genes</b> |          |                                |                               |
| ADAM28                 | 105      | AAA GTA CGG GTA CTG TCG CA     | GGC AAA TTA TCC GAC CCA CC    |
| AIF1                   | 111      | AGG AAA AGC TTT CGG ACT GC     | TTG GAG GGC AGA TCC TCA TC    |
| BMP2                   | 98       | CTT TCA ATG GAC GTG TCC CC     | GCA GCA ACG CTA GAA GAC AG    |
| BMP3                   | 117      | ATC TCC CCC AAG TCC TTT GAT    | CCC CAC AGC TCT CAC TAT ACT C |
| BMP6                   | 116      | GAC ATG GTC ATG AGC TTT GTG A  | ACC ACC TCA CCC TCA GGA AT    |
| CCL21                  | 108      | TGG CCT CTT ACT CAC CCT CT     | CTC CAT CAC TGC CTT GGG TC    |
| CCR7                   | 86       | TTC CTG TGT GGT TTT ACC GC     | AAT GAC AAG GAG AGC CAC CA    |
| CD37                   | 97       | TGA CAA GAC CAG CTT CGT GT     | GCC CAT GGT GAA GAT TCC TG    |
| CLEC12A                | 114      | CTC TCC ACC ACA CTG CAA AC     | GCT GTC CTT ATG CCA AAT CCA   |
| CLEC5A                 | 78       | GTG GCG TTG GAT CAA CAA CT     | CCA ATG GTC GCA CAG TTG AA    |
| CTGF                   | 121      | AAG GGC AAA AAG TGC ATC CG     | ATC GGC CGT CGG TAC ATA CT    |
| CXCL12                 | 123      | GTG CAT TGA CCC GAA GCT AA     | GTT TCA GAG CTG GGC TCC TA    |
| CXCL16                 | 113      | CCT GCT GGT GTA CCT GAC TC     | TCA TGA ACT GAA CCG ATG GC    |
| CXCL2                  | 78       | CAG AAA GCT TGT CTC AAC CCC    | GCC ACC AAT AAG CTT CCT CC    |
| CXCR2                  | 123      | CCC AGC ACT CAT CCC AGA ATC    | GTT GCA AGG GGG AAA TCC AG    |
| CXCR4                  | 89       | GAG AAC CAG CGG TTA CCA T      | CAT GGA GTC ATA GTC CCC TGA G |
| DLL1                   | 81       | GGG AGA AAG TGT GCA ACC C      | CAT GCT GCT CAT CAC ATC CAG   |
| dNP63                  | 99       | ACC TGG AAA ACA ATG CCC AGA    | ACG AGG AGC CGT TCT GAA TC    |
| EREG                   | 106      | ACA GGC AGT CCT CAG TAC AAC    | TTG AGC CAC ACG TGG ATT GT    |
| PDIA6                  | 115      | TCC ATC GAA TTT CAA CCG AGA AG | TGC TGC TTT CTT CCA TTC TGG   |
| FGF18                  | 76       | CCA GCA AGG AGT GTG TGT TC     | CCG GAG TAC TTA GCC GAC AT    |
| FGL2                   | 124      | GCT GGT GGT TTG ATG CAT GT     | CCA GGG TGT GCC TCA CTT AC    |
| FGFR2                  | 118      | CTG CCC TAC CTC AAG GTT CT     | CCG CCA AGC ACG TAT ATT CC    |
| FHL2                   | 111      | CGA ATC CGG TGC GAG AC         | TTG CAA TGG TGG CAG TCA AAG   |
| FSCN1                  | 107      | AAG GAC GAG CTC TTT GCT CT     | TGA TTG GCA GAC AGG TCC AT    |
| GH1                    | 87       | CCC AGA CCT CCC TCT GTT TC     | GGA GCA GCT CTA GGT TGG AT    |
| HCST                   | 105      | CCA TCT GGG TCA CAT CCT CTT    | CCT GAA GTG CCA GGG TAA AAG   |
| ID1                    | 99       | GTT CCA TTT TCC GTA TCT GCT TC | CCA CTG GCG ACT TTC ATG AT    |
| IFNGR1                 | 124      | ATG GAG ACG AGC AGG AAG TC     | TCA TCT TCC TTC TGC GTG AGT   |
| IGF1                   | 90       | ATC AGC AGT CTT CCA ACC CA     | GAA GAG ATG CGA GGA GGA CA    |
| IL13RA2                | 110      | GCT GGG AAG GTG AAG ACC TA     | TGG CTT ACG CAA AAG CAG AC    |
| IL6                    | 108      | CAA CCT GAA CCT TCC AAA GAT G  | ACC TCA AAC TCC AAA AGA CCA G |
| IL6ST                  | 72       | TCC ATC CCA TAC TCA AGG CT     | CCA TTG GCT TCA AAA GGA GGC   |
| CXCL8                  | 94       | CAA TGC GCC AAC ACA GAA AT     | TCT CCA CAA CCC TCT GCA CC    |
| ITGB2                  | 106      | CAC ACC GAG GGA CAT GCT G      | GCT GAC CTT GAA CTT CGT GC    |
| JAG1                   | 71       | TCG TGC TGC CTT TCA GTT TC     | ATT ACT GGA ATC CCA CGC CT    |
| LITAF                  | 115      | ATG GGA AGG GCA TGA ATC CT     | CGG TCC AAA AAG GTG ATG GG    |

|                          |     |                                 |                                 |
|--------------------------|-----|---------------------------------|---------------------------------|
| MAN1A1                   | 93  | ATG GCC CAA CAC TAC CTT GA      | AGC TTC TGG TCC CAG TTT CA      |
| MMP1                     | 122 | TTC CCA GCG ACT CTA GAA ACA     | ACT GGG CCA CTA TTT CTC CG      |
| MMP2                     | 90  | TGA TCT TGA CCA GAA TAC CAT CGA | GGC TTG CGA GGG AAG AAG TT      |
| MMP9                     | 120 | ACG TCT TCC AGT ACC GAG AG      | GCA GGA TGT CAT AGG TCA CG      |
| NOTCH1                   | 83  | CTG GAC CAG ATT GGG GAG TT      | GCA CAC TCG TCT GTG TTG AC      |
| NOTCH2                   | 108 | ATT TCA AGT GCT CTT GCC CA      | TAT CCA TGC ACT GAC CAC CA      |
| OGFRL1                   | 112 | AAA TGT TGC TCG GGC TGT TA      | ATA TCC AAG CTC ACC AAG GCT     |
| PTH                      | 73  | AAT GGC TGC GTA AGA AGC TG      | GCA TCT CTG GGA GCT AGA GG      |
| PTHLH                    | 109 | AAG GTG GAG ACG TAC AAA GAG C   | CAG AGC GAG TTC GCC GTT T       |
| RARRES3                  | 84  | CTG TGA GCA CTT TGT CAC CC      | GCC ACA CCA ACT TCA ACC TT      |
| S100A8                   | 99  | TCA GCT GTC TTT CAG AAG ACC T   | CTT GTG GTA GAC GTC GAT GAT     |
| S100A9                   | 100 | TCA AAG AGC TGG TGC GAA AA      | GCA TTT GTG TCC AGG TCC TC      |
| SEMA4A                   | 75  | CCC CCT TCT TCT TTC TCC TGA AT  | TGA ACC AGC CAC AGT GGG AA      |
| SPP1                     | 110 | TCA CCT GTG CCA TAC CAG TT      | AGA TGG GTC AGG GTT TAG CC      |
| TGFB1                    | 92  | CTT CCA GCC GAG GTC CTT         | CCC TGG ACA CCA ACT ATT GC      |
| THBD                     | 108 | ACA TCC TGG ACG ACG GTT TC      | CGC AGA TGC ACT CGA AGG TA      |
| TLR4                     | 97  | TGC GTG AGA CCA GAA AGC TG      | GCT CCG GAG TCT GAA AGC TC      |
| TNC                      | 115 | GGA AAC TGC CCT CCT TAC CT      | GGT GGT ATC TGG ACC CAC AA      |
| TNF                      | 112 | AGC CTG TAG CCC ATG TTG TA      | AGC TGG TTA TCT CTC AGC TCC     |
| VCAM1                    | 125 | ACA ATG AAT CCT GTT AGT TTT GGG | TGA ATC TCT GGA TCC TTA GGA AAA |
| <b>Internal Controls</b> |     |                                 |                                 |
| ACTB                     | 76  | ACA GAG CCT CGC CTT TGC         | CGC GGC GAT ATC ATC ATC CA      |
| GAPD                     | 117 | TTG AGG TCA ATG AAG GGG TC      | GAA GGT GAA GGT CGG AGT CA      |
| PGK1                     | 108 | CTT GGG ACA GCA GCC TTA AT      | CAA GCT GGA CGT TAA AGG GA      |
| RPL13A                   | 93  | GGC CCA GCA GTA CCT GTT TA      | AGA TGG CGG AGG TGC AG          |

**Supplemental Table 2. shRNA targeting sequences.**

|               |                                                                               |
|---------------|-------------------------------------------------------------------------------|
| IL6 sh2 F     | CCG GGC AGG CAC TTA CTA CTA ATA ACT CGA GTT ATT AGT AGT AAG TGC CTG CTT TTT G |
| IL6 sh2 R     | AAT TCA AAA AGC AGG CAC TTA CTA CTA ATA ACT CGA GTT ATT AGT AGT AAG TGC CTG C |
| IL8 sh3 F     | CCG GCA AGA GAA TAT CCG AAC TTT ACT CGA GTA AAG TTC GGA TAT TCT CTT GTT TTT G |
| IL8 sh3 R     | AAT TCA AAA ACA AGA GAA TAT CCG AAC TTT ACT CGA GTA AAG TTC GGA TAT TCT CTT G |
| CXCL1/2 sh1 F | CCG GCC CTT CTA TAG TGG CAT CCT GCT CGA GCA GGA TGC CAC TAT AGA AGG GTT TTT G |
| CXCL1/2 sh2 R | AAT TCA AAA ACC CTT CTA TAG TGG CAT CCT GCT CGA GCA GGA TGC CAC TAT AGA AGG G |
| gp130 sh2 F   | CCG GAC CGT GCA TCG CAC CTA TTT ACT CGA GTA AAT AGG TGC GAT GCA CGG TTT TTT G |
| gp130 sh2 R   | AAT TCA AAA AAC CGT GCA TCG CAC CTA TTT ACT CGA GTA AAT AGG TGC GAT GCA CGG T |
| Scramble sh F | CCG GCC TAA GGT TAA GTC GCC CTC GCT CGA GCG AGG GCG ACT TAA CCT TAG GTT TTT G |
| Scramble sh R | AAT TCA AAA ACC TAA GGT TAA GTC GCC CTC GCT CGA GCG AGG GCGA CTT AAC CTT AGG  |

The above oligos were designed for overhang cloning after annealing of forward and reverse sequences into tet-pLKO-neo (a gift from Dmitri Wiederschain, Addgene plasmid # 21916) or tet-pLKO-puro (a gift from Dmitri Wiederschain, Addgene plasmid # 21915) plasmids. The sequences targeting CXCL1/2 were derived from Singh et al (3). All other shRNAs were designed using sequences published by the Broad Institute's Genetic Perturbation Platform (4). All oligos selected resulted from validation of target sequences using RNAi and selecting for efficacy and low levels of off-target effects (as measured by effects on the other receptors/cytokines/chemokines).

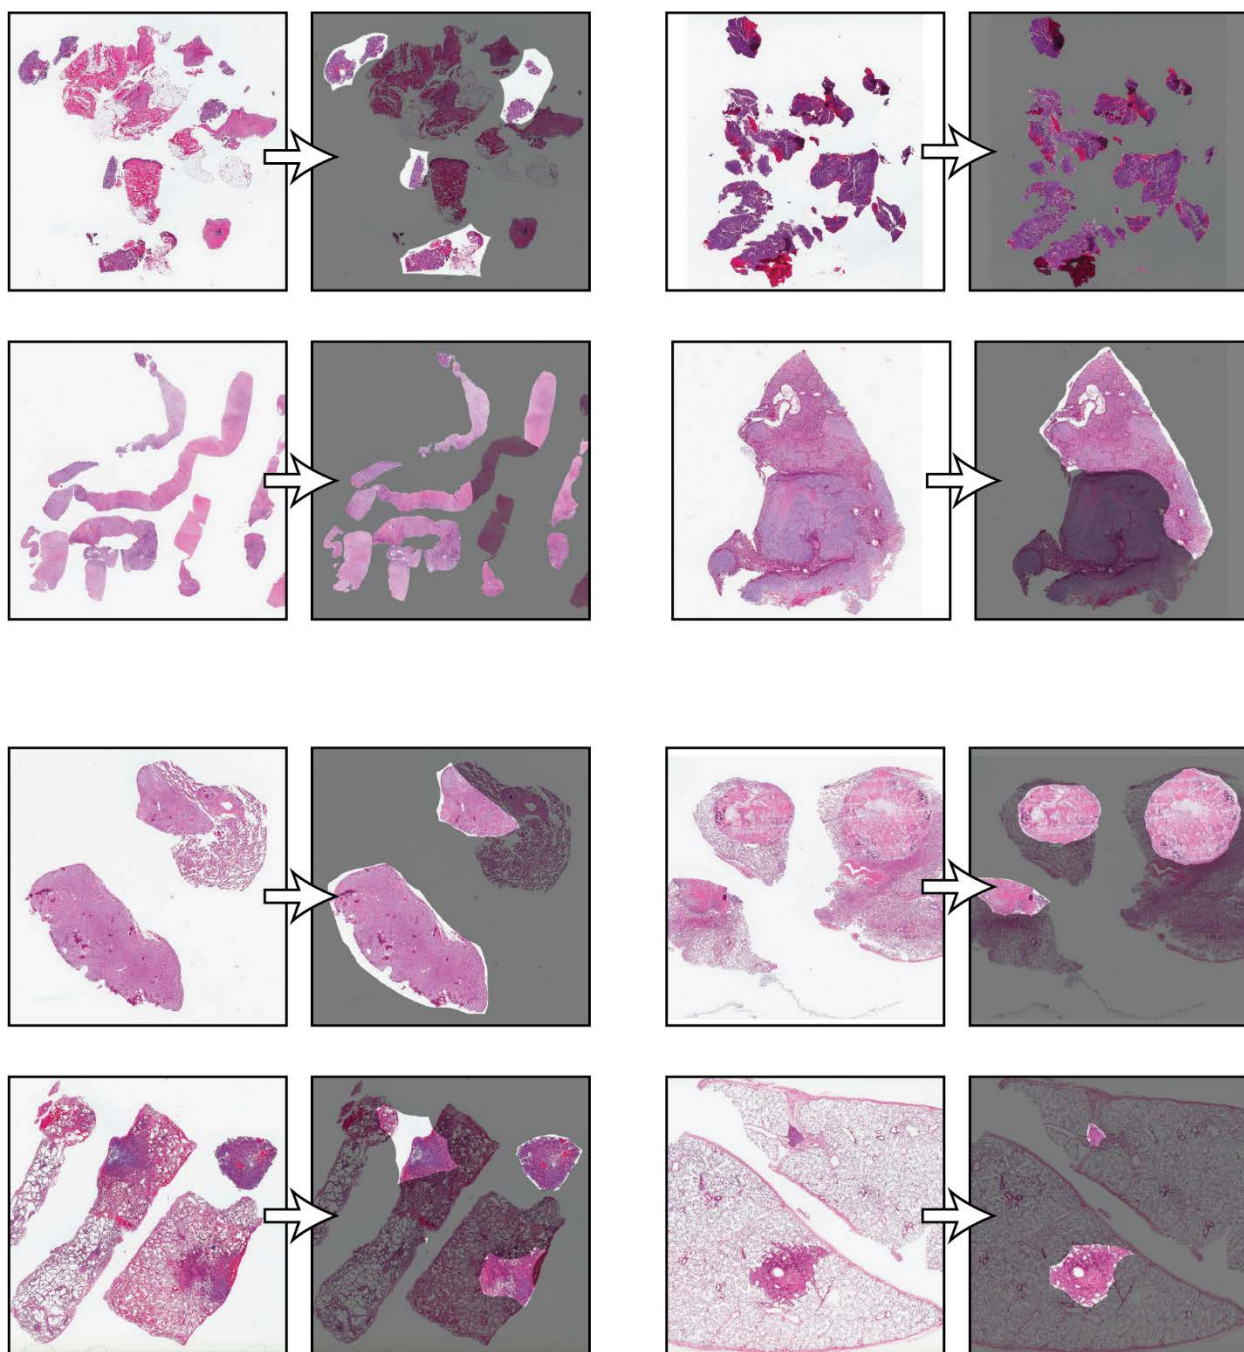

**Supplemental Figure 1. Representative gross sections from primary and metastatic tumor samples.** H&E stained slides from center sections (11 adjacent sections cut, section 6 processed for H&E shown) show specimens taken from primary tumor biopsies (top four) and lung metastases (bottom four). Tissues masked in the right-side images were dissected away on the slides prior to processing.

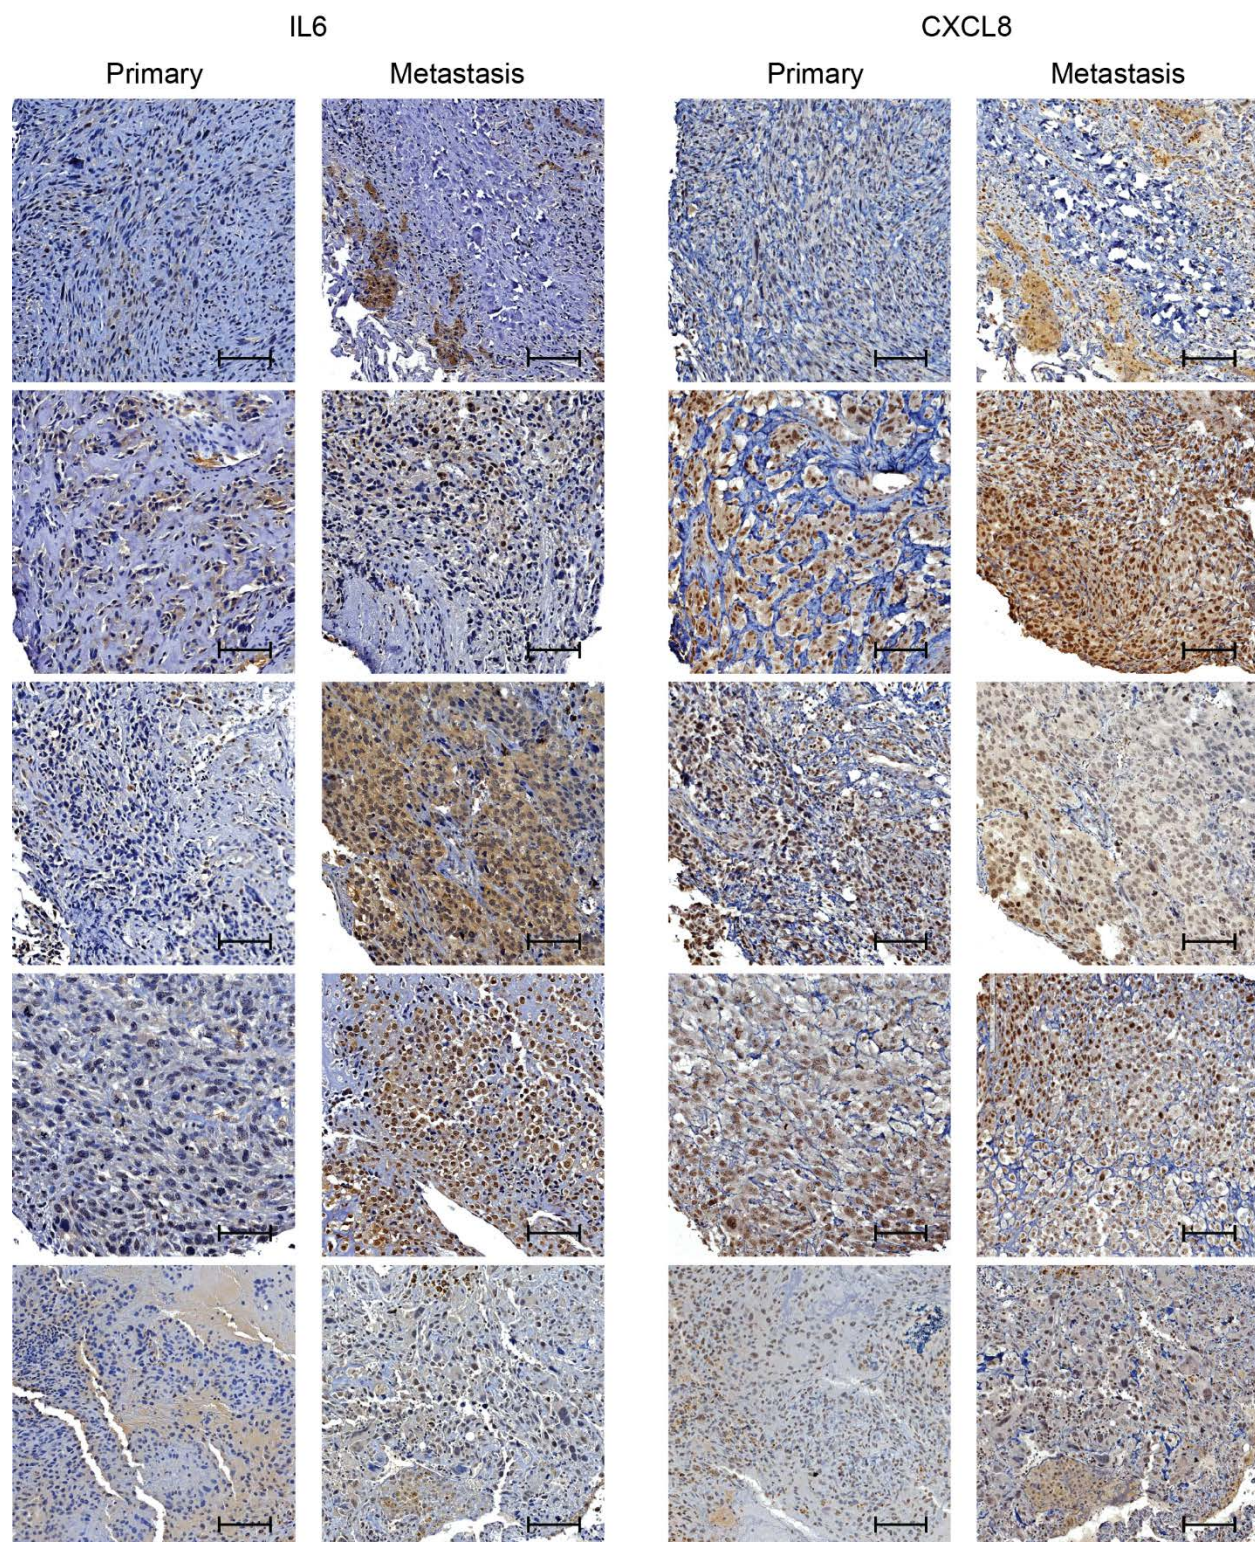

**Supplemental Figure 2. Additional IHC on patient samples from primary tumors and lung metastasis confirms changes in the patterns of IL6 and CXCL8 expression. Additional**

examples of IHC from patient primary and metastasis tumors stained by immunohistochemistry for IL6 and CXCL8. Each row represents samples from an individual patient. The columns on the left show primary and metastasis tumors stained for IL6. Panels in the right two columns show the same samples stained for CXCL8. Scale bars represent 100  $\mu$ m.

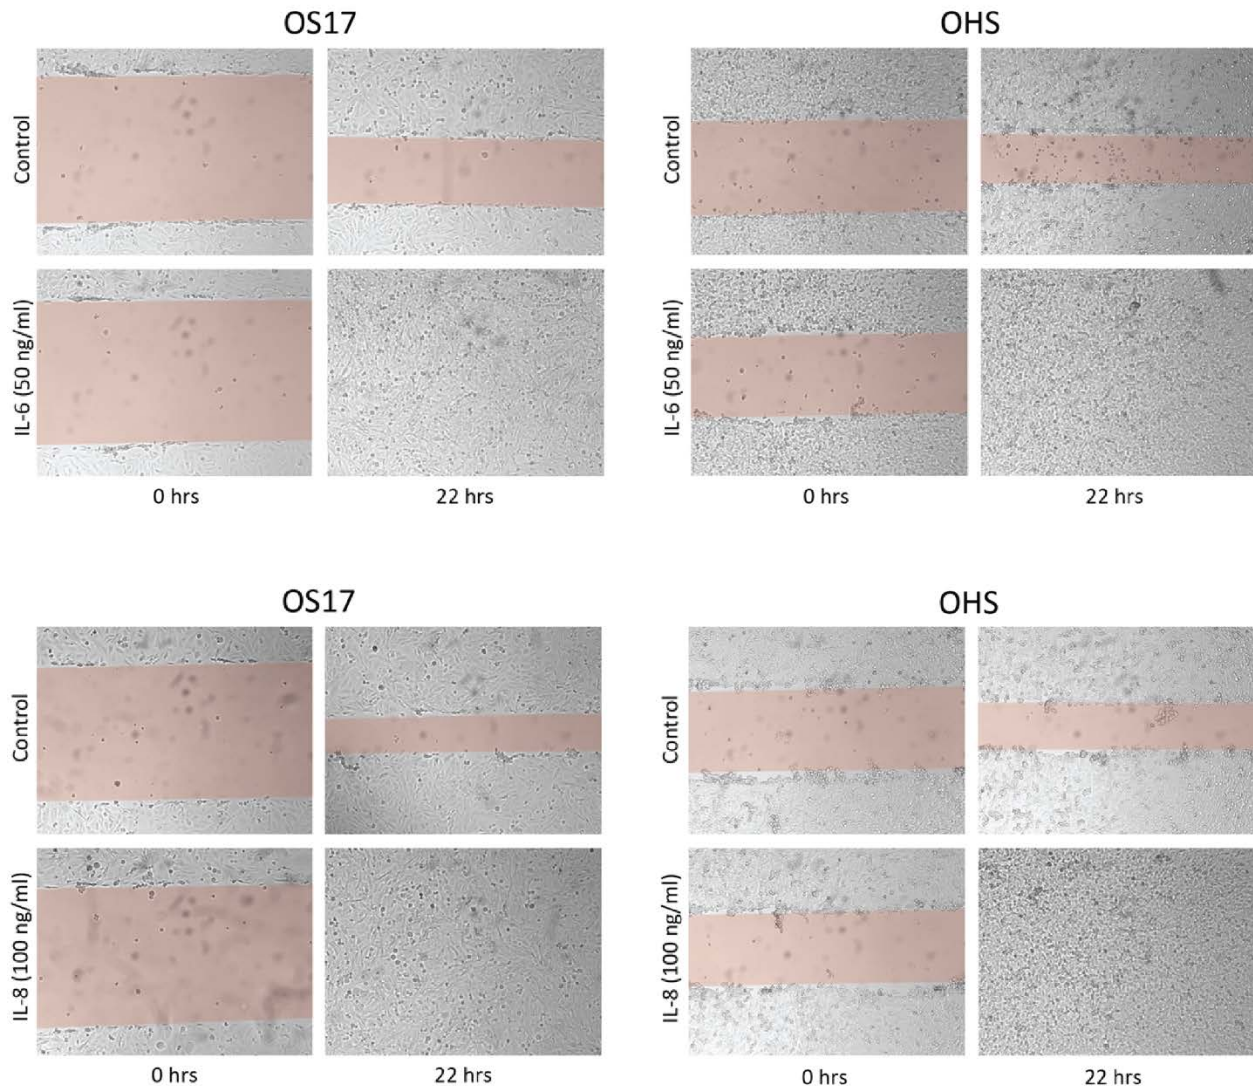

**Supplemental Figure 3. IL6 and CXCL8 (IL8) stimulate chemokinesis in both highly metastatic and poorly metastatic OS cells.** OS-17 or OHS cells were cultured in 96-well flat-bottomed plates, then “wounded” with a standardized instrument (IncuCyte® Scratch Wound Cell Migration and Invasion System). Serial images were subsequently taken to observe and quantify the rate at which the “wound” closed. Representative images from each data set are shown above.

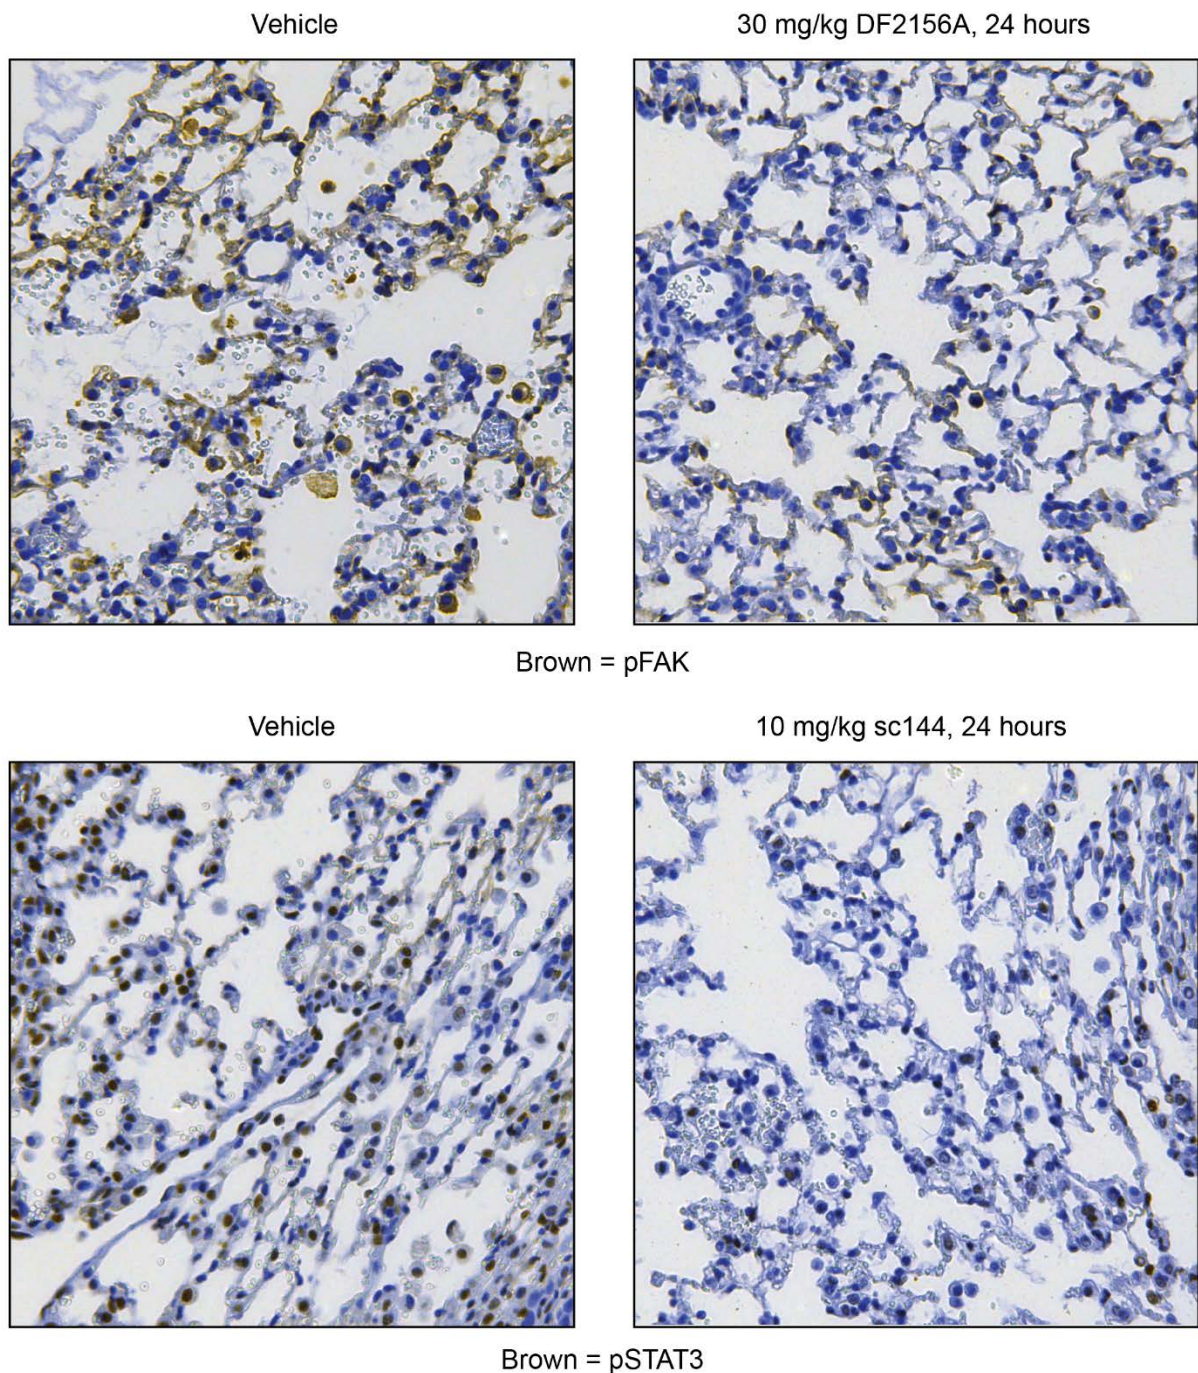

**Supplemental Figure 4. PD analysis in lung tissue of mice treated with DF2156A and sc144.** Mice treated with injections of either DF2156A or SC144 daily were euthanized 24 hours subsequent to their 14th dose of drug. Lungs harvested from those mice were processed using standard FFPE, then sectioned and stained with IHC for either pFAK (downstream of

CXCL8) or pSTAT3 (downstream of IL6). Representative images are shown above. Receptor blockade reduced the amount of activation seen and the number of infiltrating cells, even at trough concentrations.

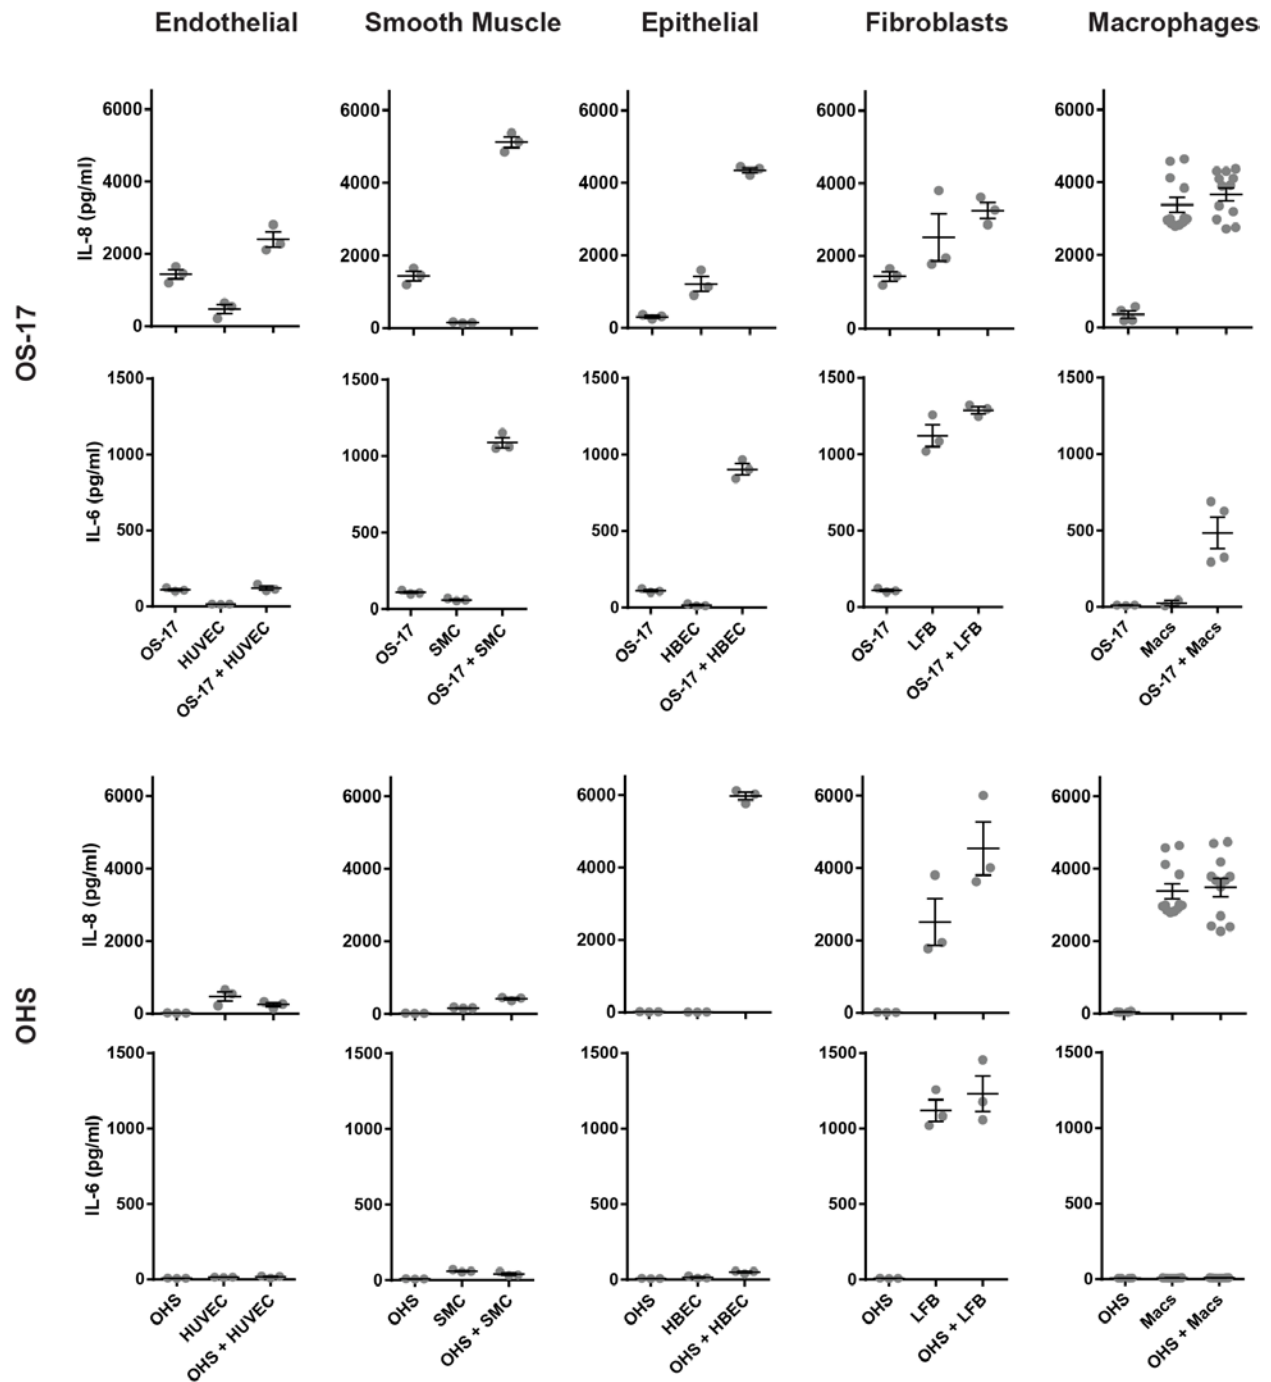

**Supplemental Figure 5. Full panels of co-culture data evaluating for interactions that drive production of IL6 and CXCL8.** OS cells (either OS-17 or OHS) were cultured alone or together with various primary human cell cultures: endothelial (human umbilical vein endothelial cells, HUVECs), lung smooth muscle cells (human bronchial smooth muscle cells, BSMCs),

lung epithelial cells (human bronchial epithelial cells, HBECs), lung fibroblasts (human lung fibroblasts), or macrophages (peripheral blood monocytes driven to early tissue macrophage phenotype as described in methods). Supernatants from each culture were subjected to ELISA for either IL6 or CXCL8.

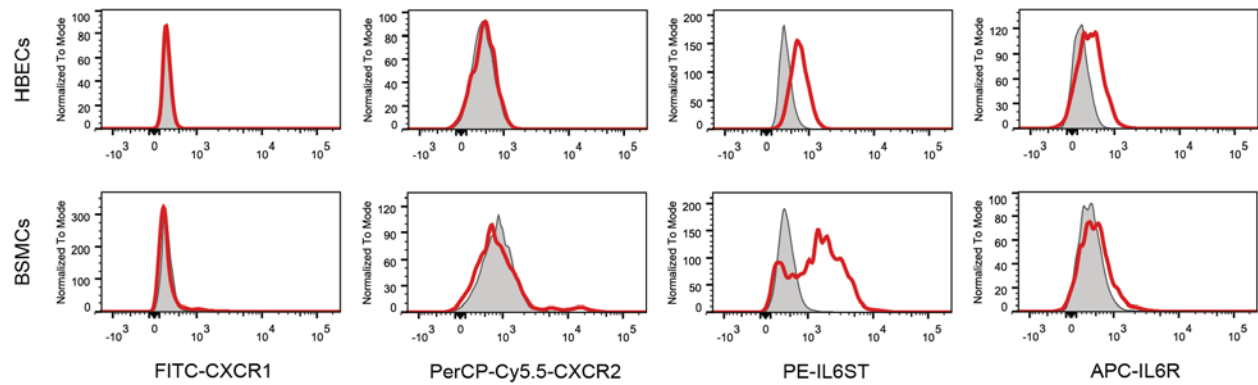

**Supplemental Figure 6. Primary lung cells express receptors for IL6, while a small subset express receptors for CXCL8.** Flow cytometry to evaluate for cell surface expression of the receptors for IL6 and CXCL8 on HBEC and BSMC. Both cell types express significant quantities of IL6 receptor components. A small subset of BSMCs expresses receptors for CXCL8, especially CXCR2.

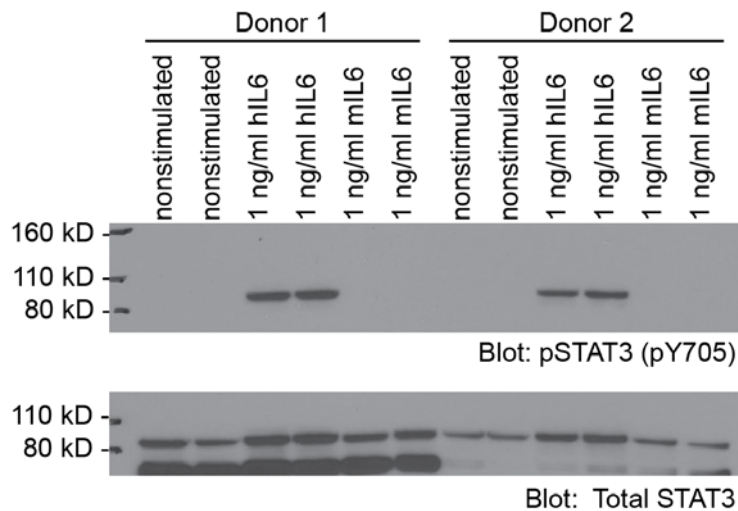

**Supplemental Figure 7. Murine IL6 does not activate human receptors.** Monocytes isolated from human blood (Miltenyi monocyte isolation kit, #130-096-537) were cultured in chemically defined hematopoietic media (Lonza X-VIVO, #BE02-060Q) supplemented with 10 ng/ml M-CSF for 72 hours, then starved in RPMI alone overnight. Wells were then treated with human or murine IL6 as noted above. 30 minutes after addition of cytokine, cells were lysed and harvested. Western blots were performed to evaluate for phospho- or total-STAT3 as noted.

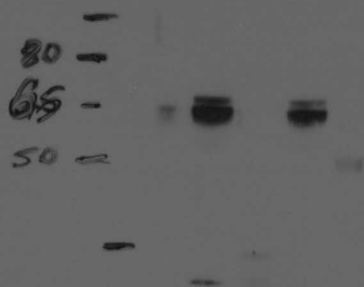

Figure 6 deltaNp63

pSTAT3 Y705

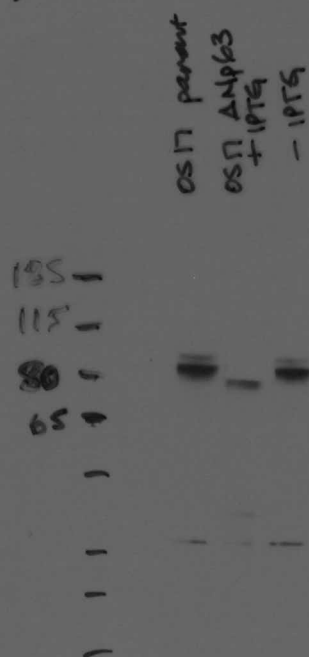

Figure 6 pSTAT3 Y705

TOTAL STAT3 EXPOSURE 1

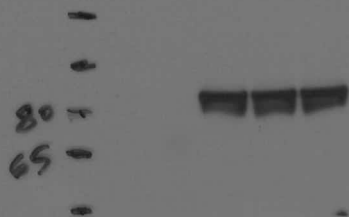

Figure 6 Total STAT3

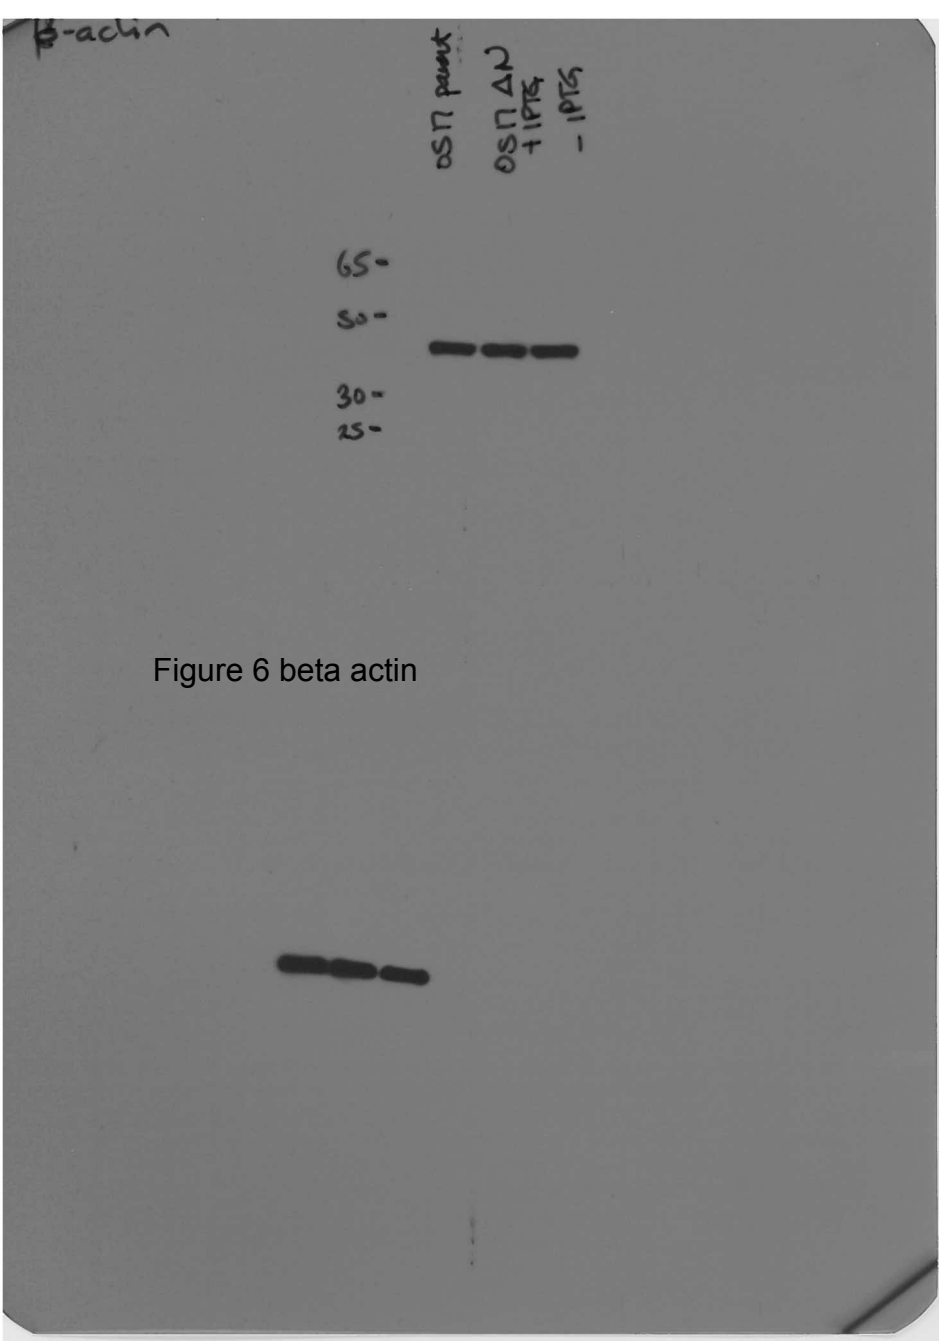

Figure 6 beta actin

Supplemental Figure 7

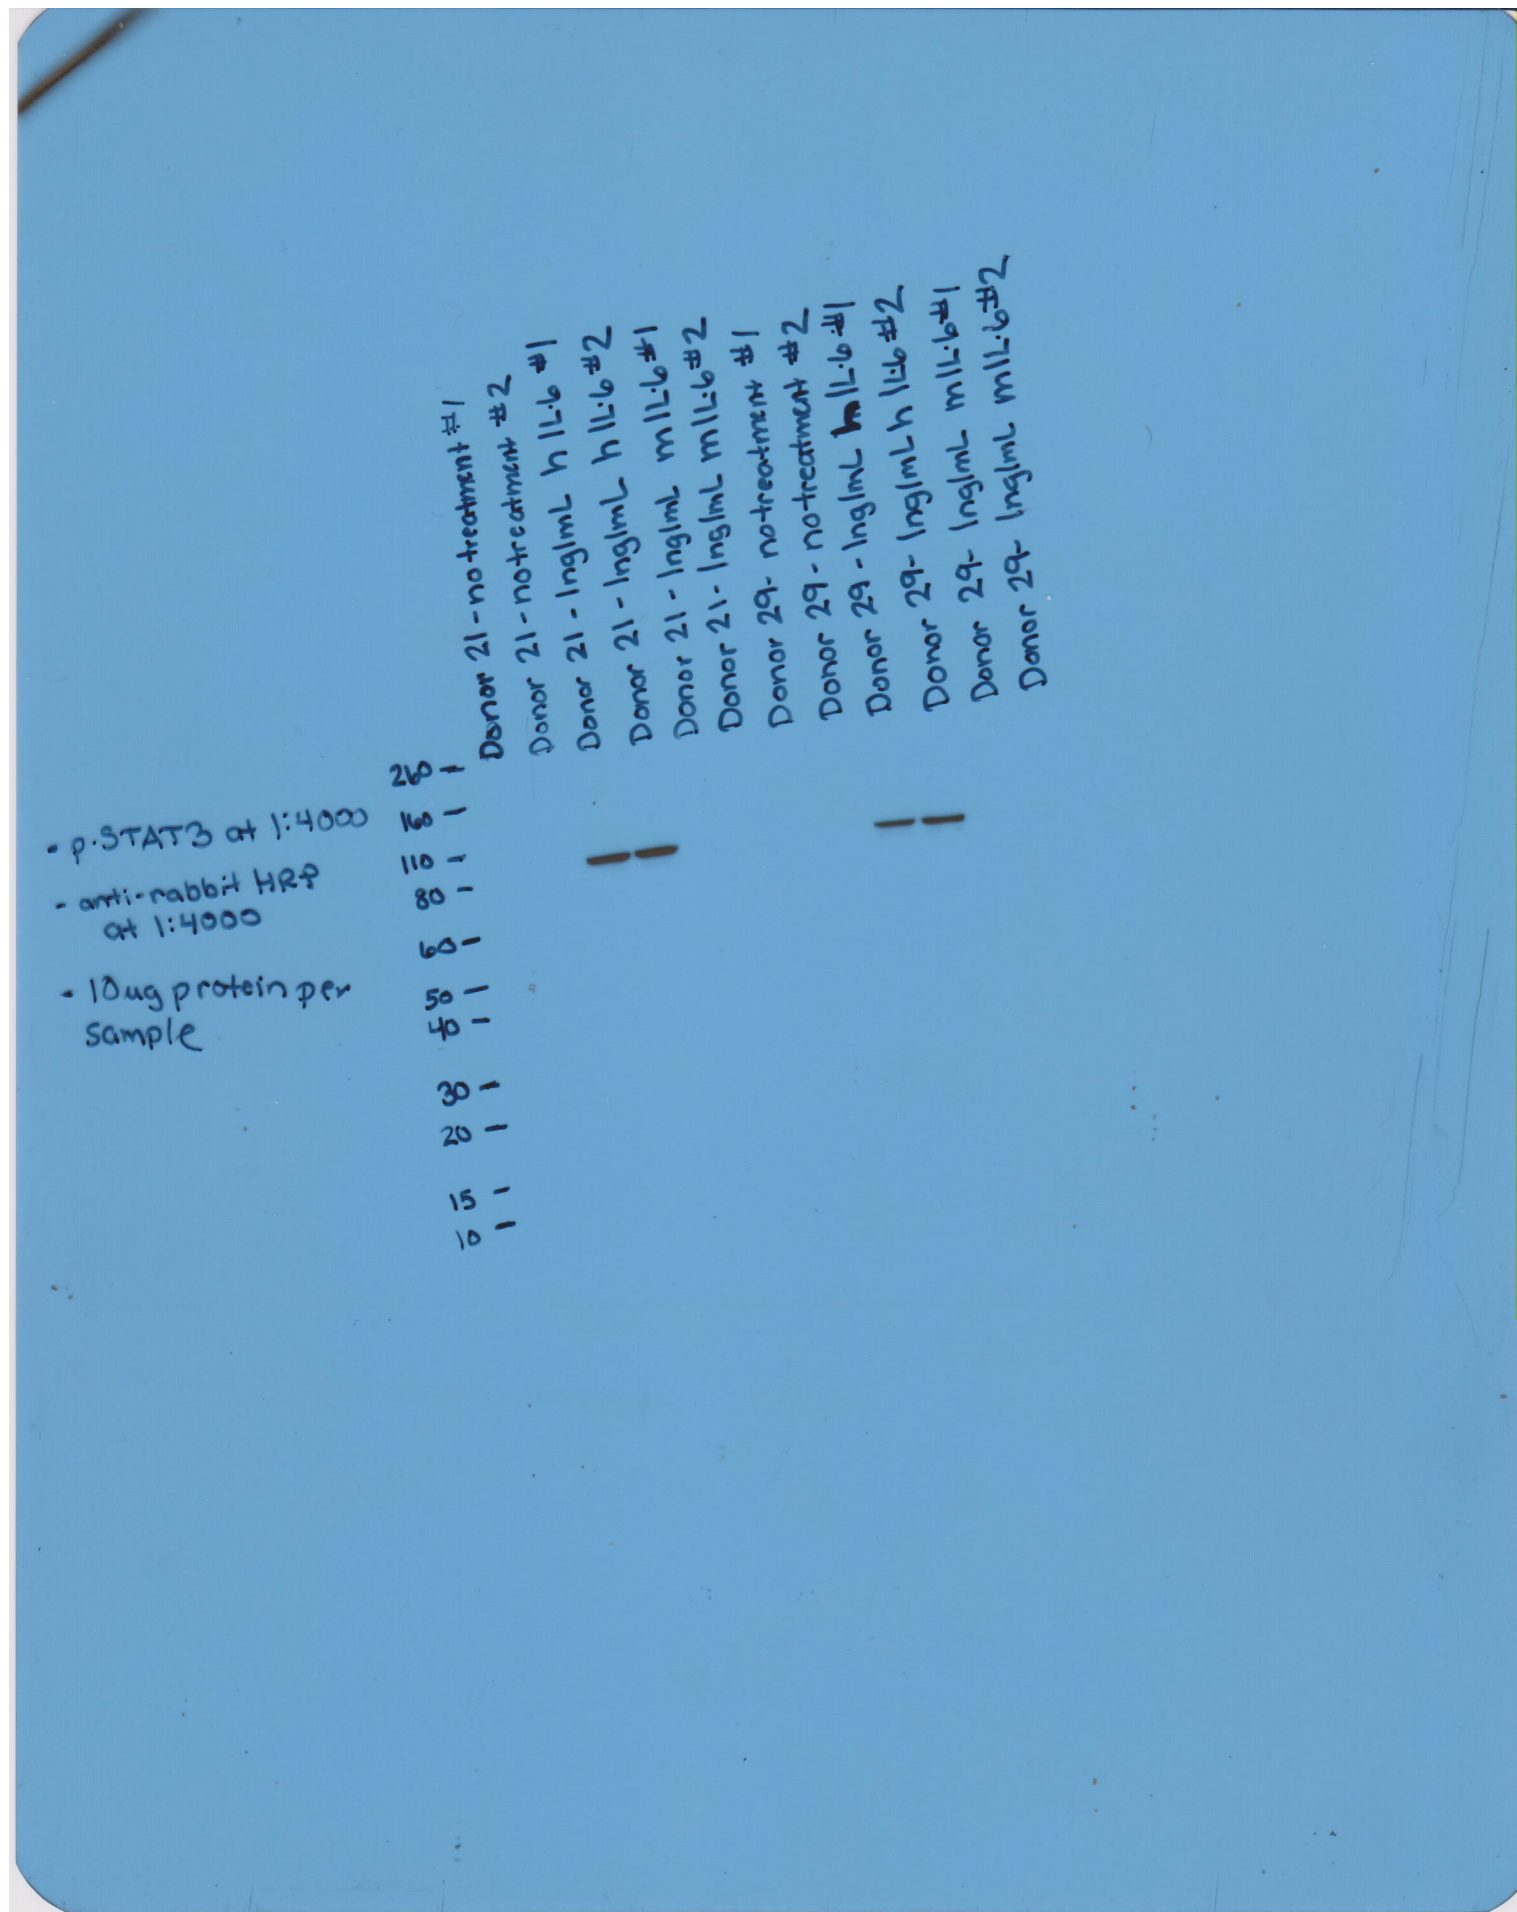

Supplemental Figure 7

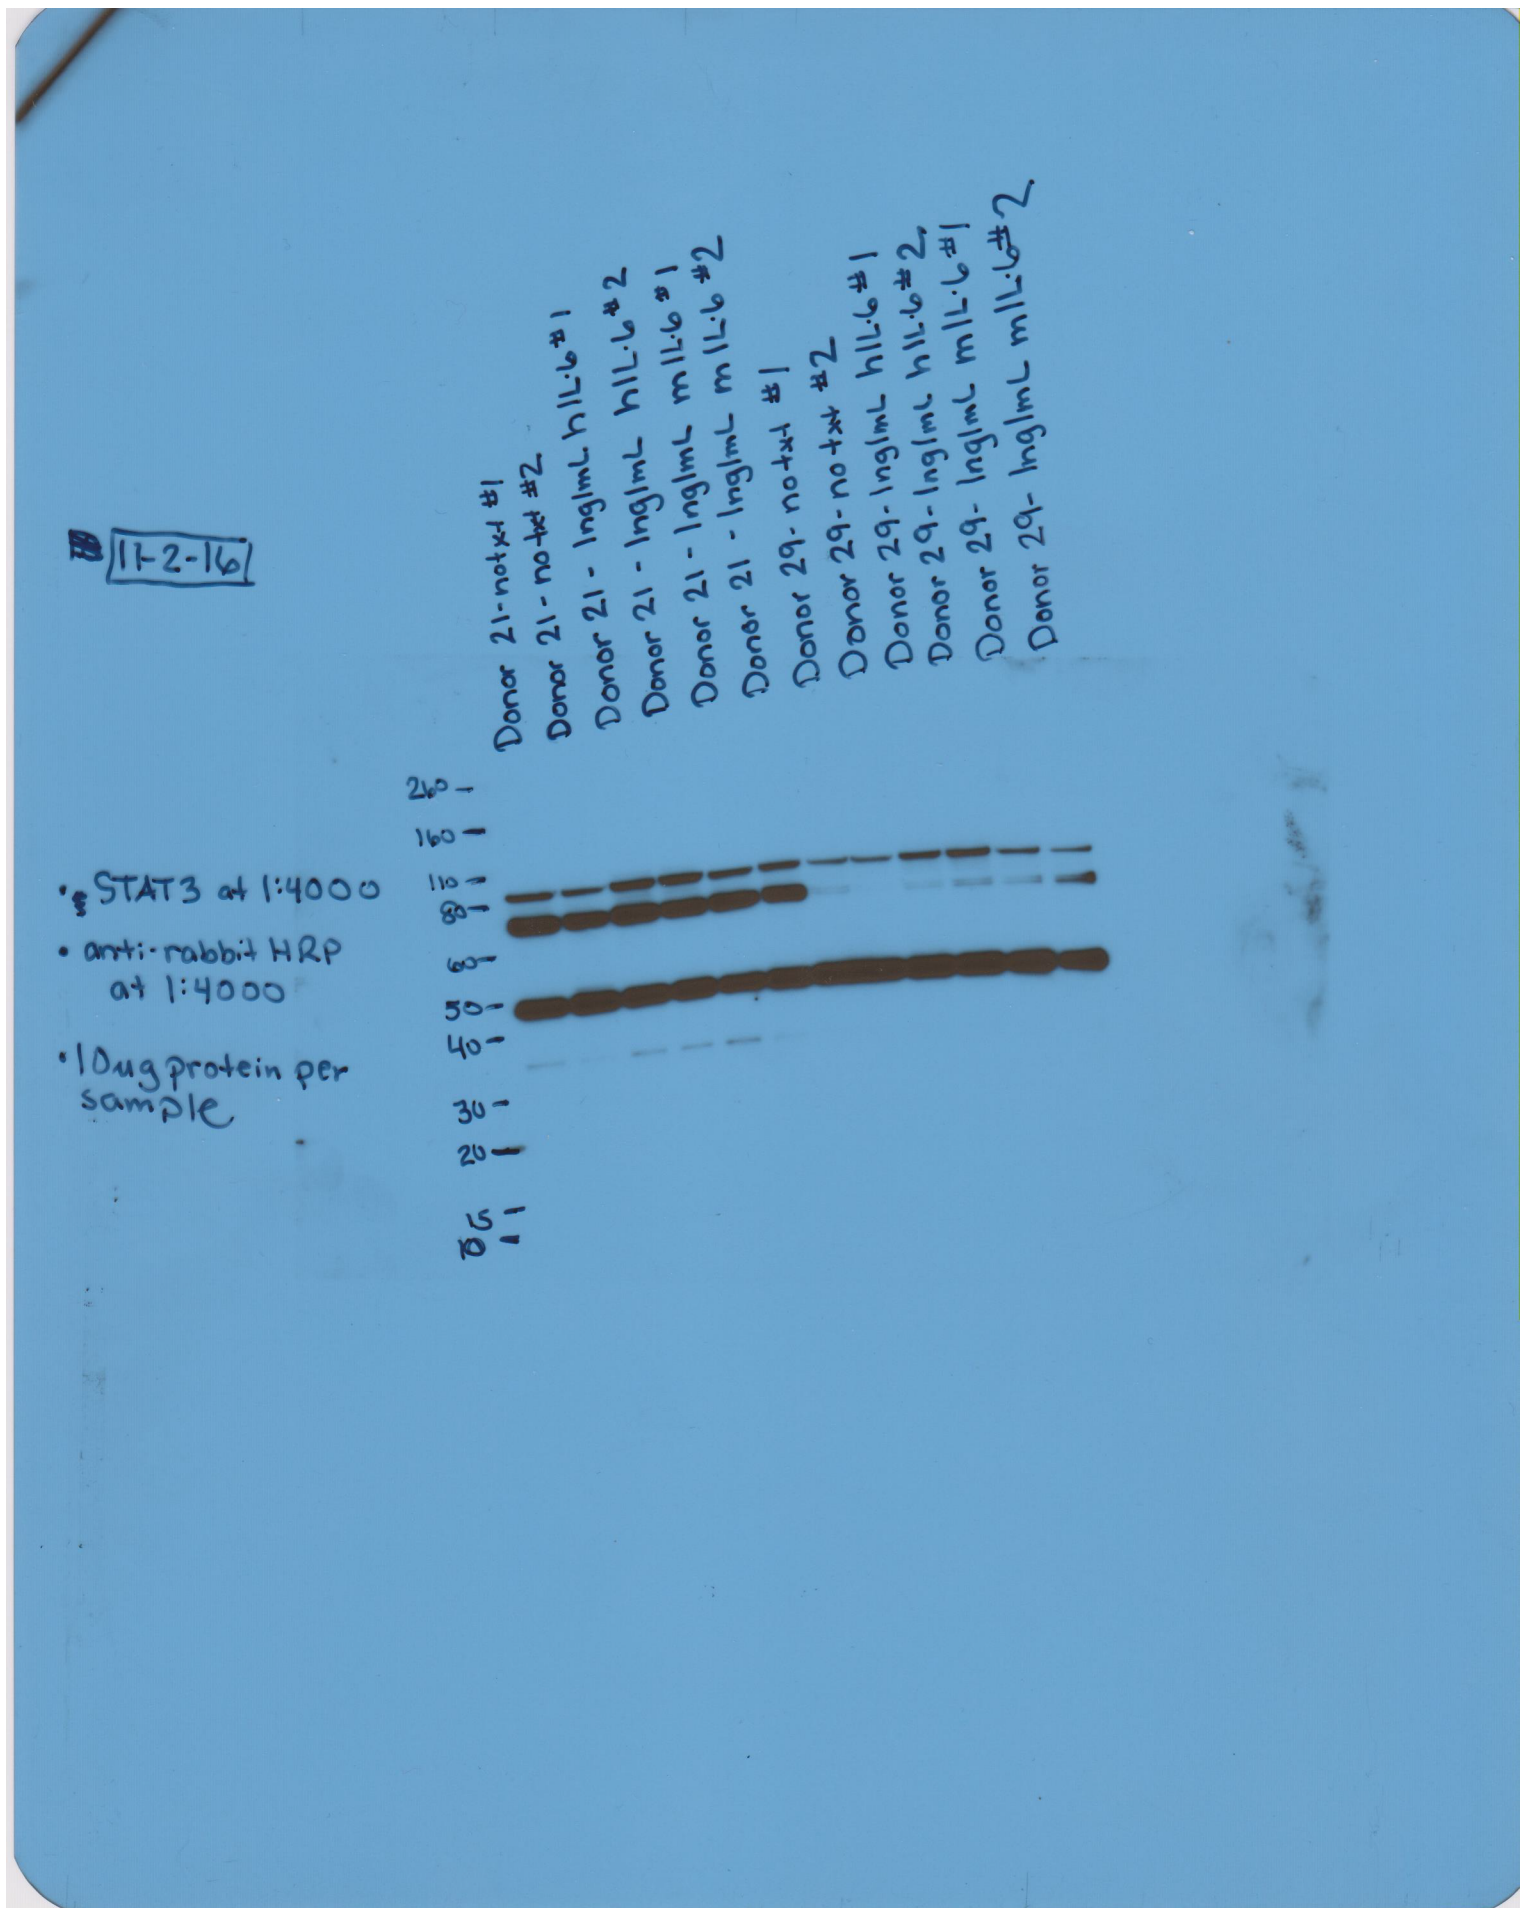

Supplement: jciinsight-3-99791-s023.pdf [file jciinsight-3-99791-s023.pdf]
